# Supplementary material for: The Cholinergic Anti-Inflammatory Pathway Attenuates the Development of Atherosclerosis in Apoe-/- Mice through Modulating Macrophage Functions
Source: MDPI journal article supplement (doi:10.3390/biomedicines9091150), 2021-09-03

## Supplementary Figures

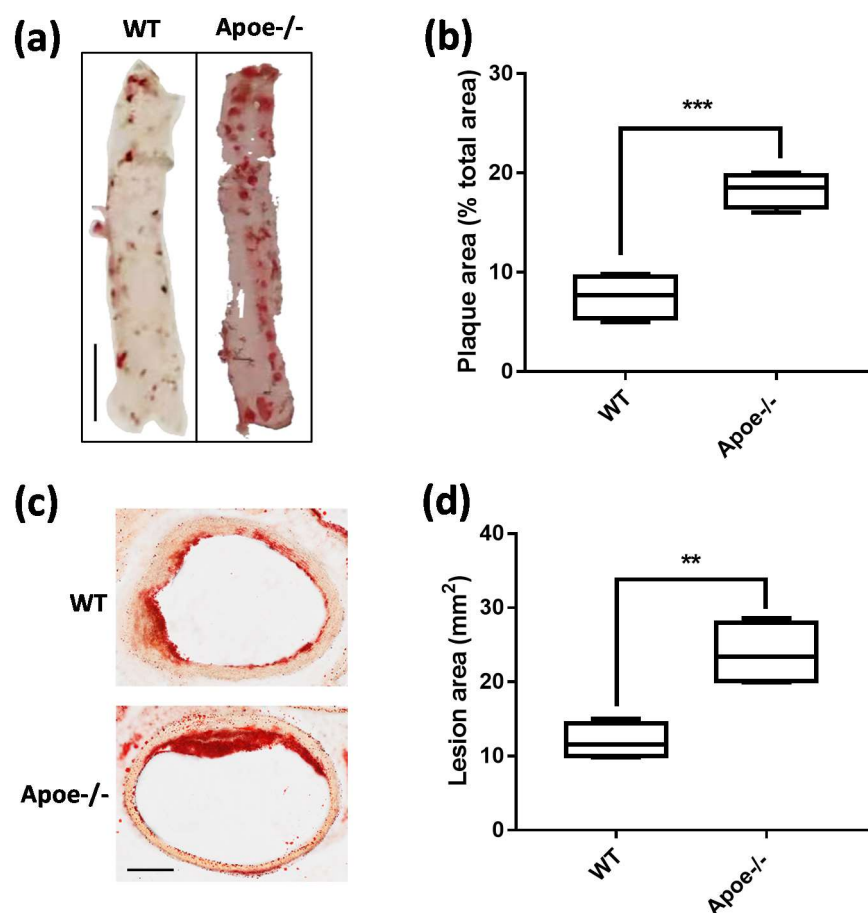

**Supplementary Figure S1** Validation of the development of atherosclerotic plaques in HFD-fed *Apoe*<sup>-/-</sup> mice. The wild type (WT) and *Apoe*<sup>-/-</sup> mice were fed with high fat food to induce the formation of atherosclerotic plaques in aorta. (a) Oil Red O staining of en face preparations of the thoracic aorta from WT and *Apoe*<sup>-/-</sup> mice. Representative samples are shown. Scale bars represent 200 mm. (b) Quantitative analysis of the atherosclerotic plaque area in the aorta. Values represent mean  $\pm$  SD (n = 3 mice). \*\*\*  $p < 0.001$  as compared to WT. (c) The aortic arch from WT and *Apoe*<sup>-/-</sup> mice were sectioned and stained with Oil Red O. Scale bar represent 100  $\mu$ m. (d) Quantitative analysis of the atherosclerotic lipid lesion in aortic root (Average of 3–5 sections per mouse). n = 18–20 sections; Values represent mean  $\pm$  SD. \*\*\*  $p < 0.001$  as compared to WT.

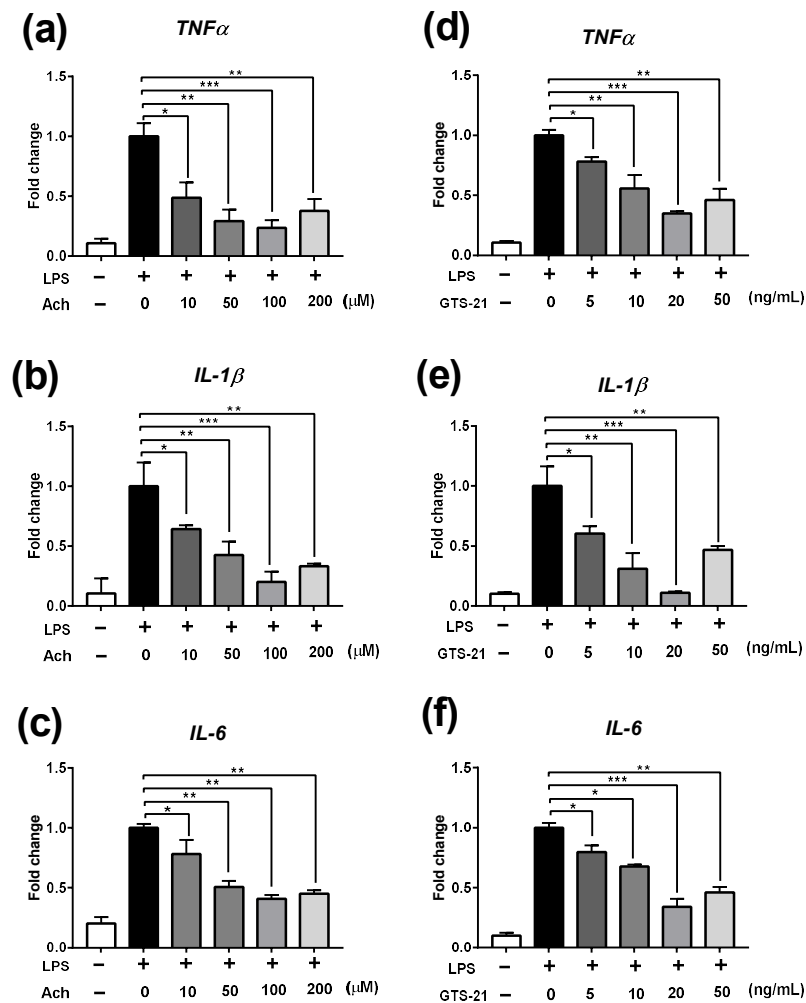

**Supplementary Figure S2** Ach and GTS-21 inhibit the expression of pro-inflammatory genes in LPS induced RAW264.7. The cells were treated with Ach or GTS-21 for 24h in the presence of LPS, and then collected for the experiment. (a – c) The mRNA expression of  $TNF\alpha$  (a),  $IL-1\beta$  (b) and  $IL-6$  (c) were dose dependently depressed by the treatment of Ach. Data are presented as means  $\pm$  SD ( $n = 3$  biological replicates). \*  $p < 0.05$ , \*\*  $p < 0.01$ , \*\*\*  $p < 0.001$  as compared to LPS-induced cells. (d – f) The mRNA expression of  $TNF\alpha$  (d),  $IL-1\beta$  (e) and  $IL-6$  (f) were dose dependently depressed by the treatment of GTS-21. Data are presented as means  $\pm$  SD ( $n = 3$  biological replicates). \*  $p < 0.05$ , \*\*  $p < 0.01$ , \*\*\*  $p < 0.001$  as compared to LPS-induced cells.

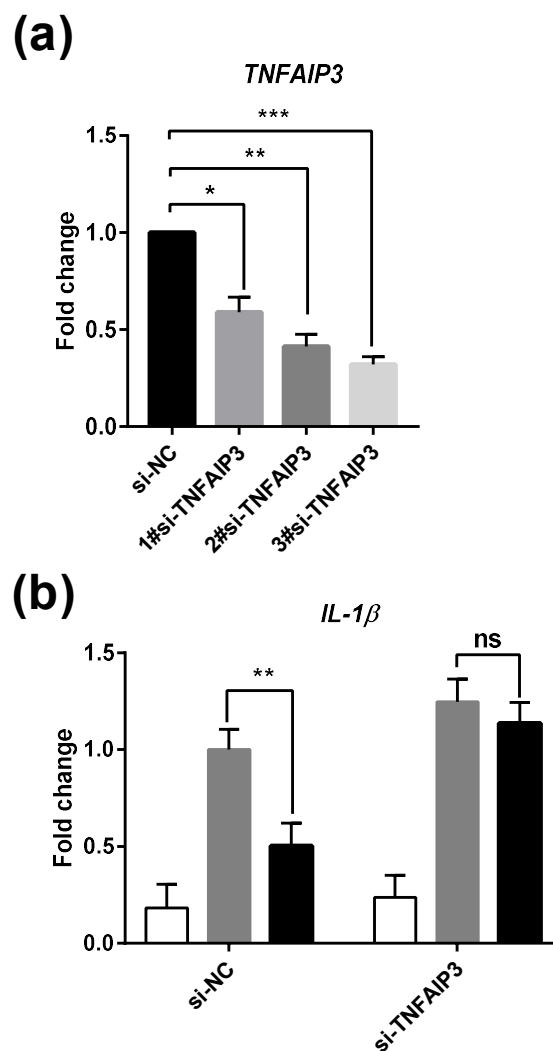

**Supplementary Figure S3** (a) The mRNA expression of *TNFAIP3* were determined in BMDM cells transfected with three siRNAs of *TNFAIP3*. (b) GTS-21 inhibited expression of *IL-1 $\beta$*  was prevented by siRNA interference of *TNFAIP3* (3# si*TNFAIP3*). Data are presented as means  $\pm$  SD (n = 3 biological replicates). \*  $p < 0.05$ , \*\*  $p < 0.01$ , \*\*\*  $p < 0.001$ , ns indicates not significant.

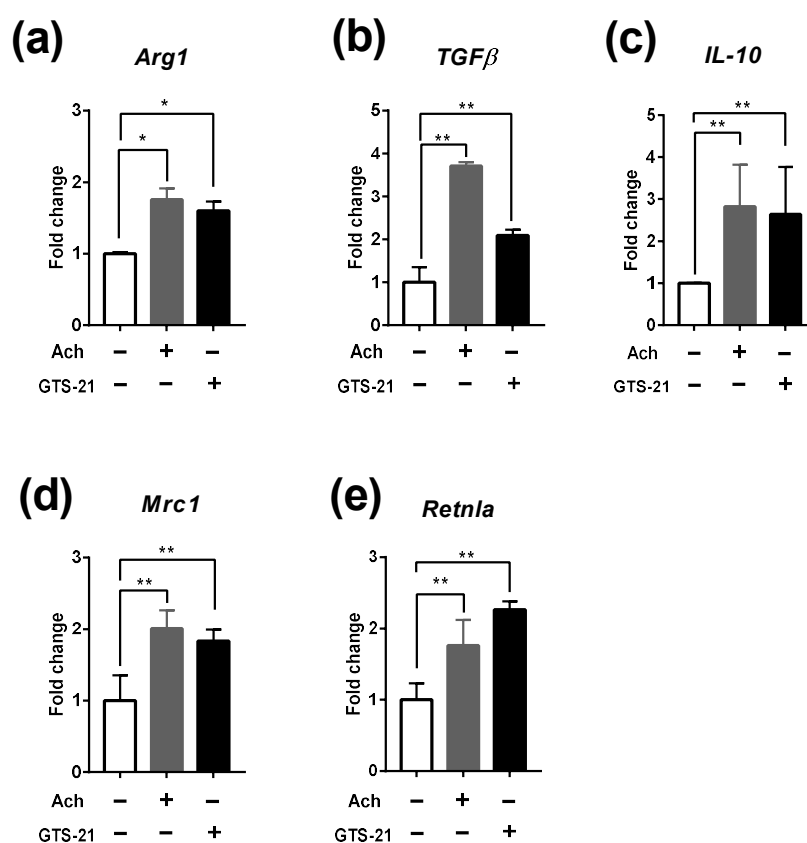

**Supplementary Figure S4** Ach and GTS-21 promoted the mRNA expression of M2 marker genes in IL4-induced RAW264.7. The cells were treated with Ach or GTS-21 in the presence of IL4 for 24h, and then collected for qRT-PCR analysis. (a – e) The mRNA expression of *Arg1* (a), *TGFβ* (b), *IL-10* (c), *Mrc1* (d) and *Retnla* (e) were upregulated by the treatment of Ach (100 μM) and GTS-21 (20 ng/mL). Data are presented as means ± SD (n = 3 biological replicates). \*  $p < 0.05$ , \*\*  $p < 0.01$  as compared to IL4 induced cells.

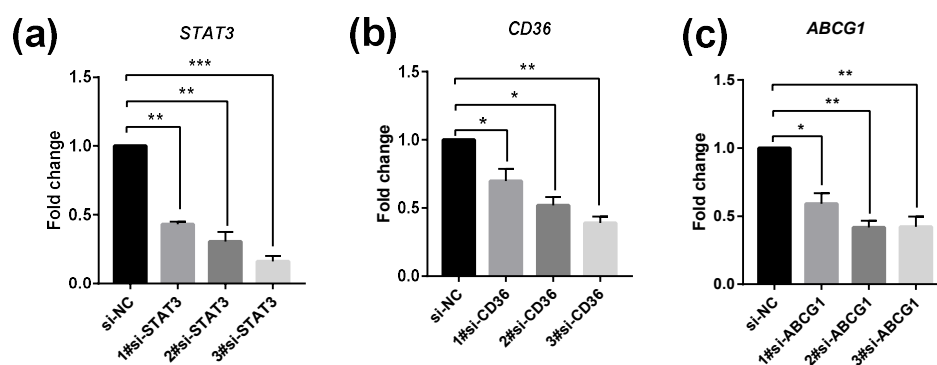

**Supplementary Figure S5** The mRNA expression of STAT3 (a), CD36 (b) and ABCG1 (c) were determined in macrophages after the transfection of their respective siRNAs. Data are presented as means  $\pm$  SD ( $n = 3$  biological replicates). \*  $p < 0.05$ , \*\*  $p < 0.01$  as compared to si-NC.

Figures of replicates for experiment

A second western blot replicate for:

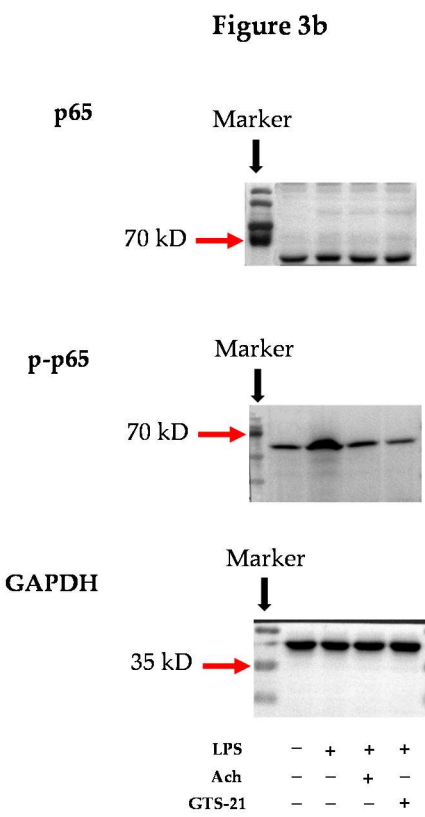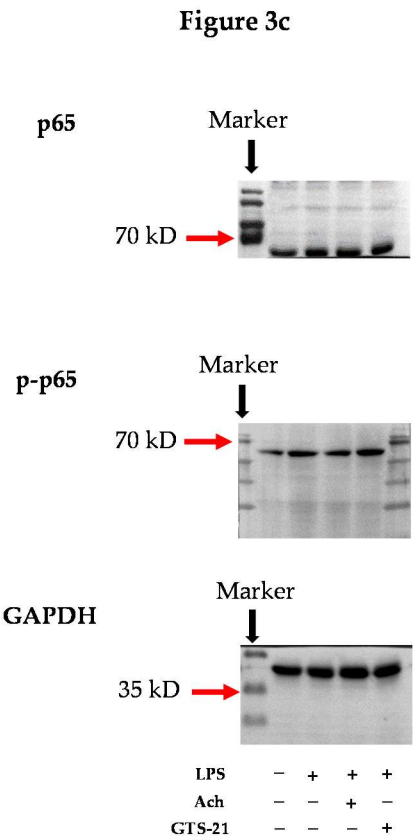

A second western blot replicate for:

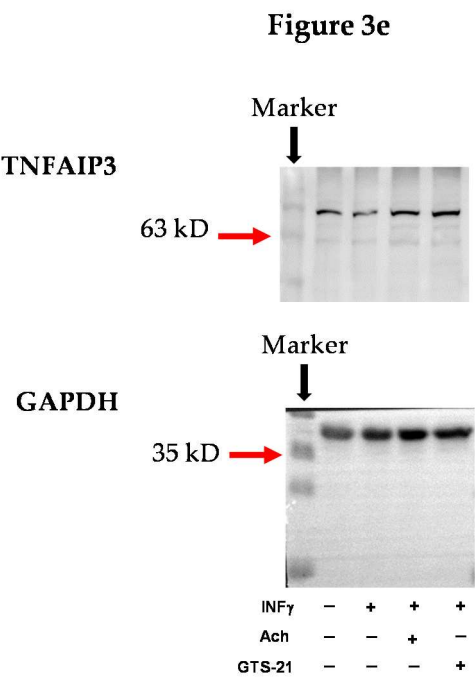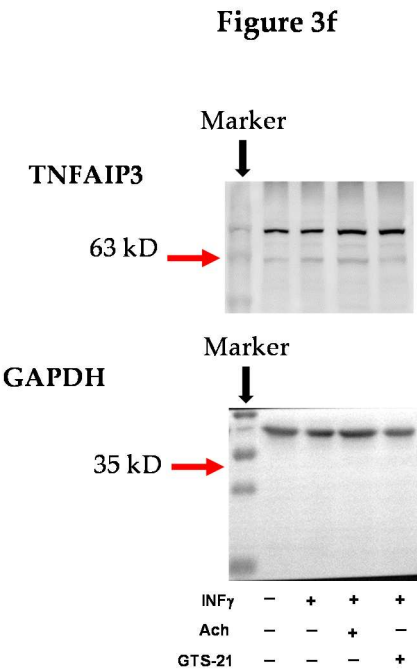

A second western blot replicate for:

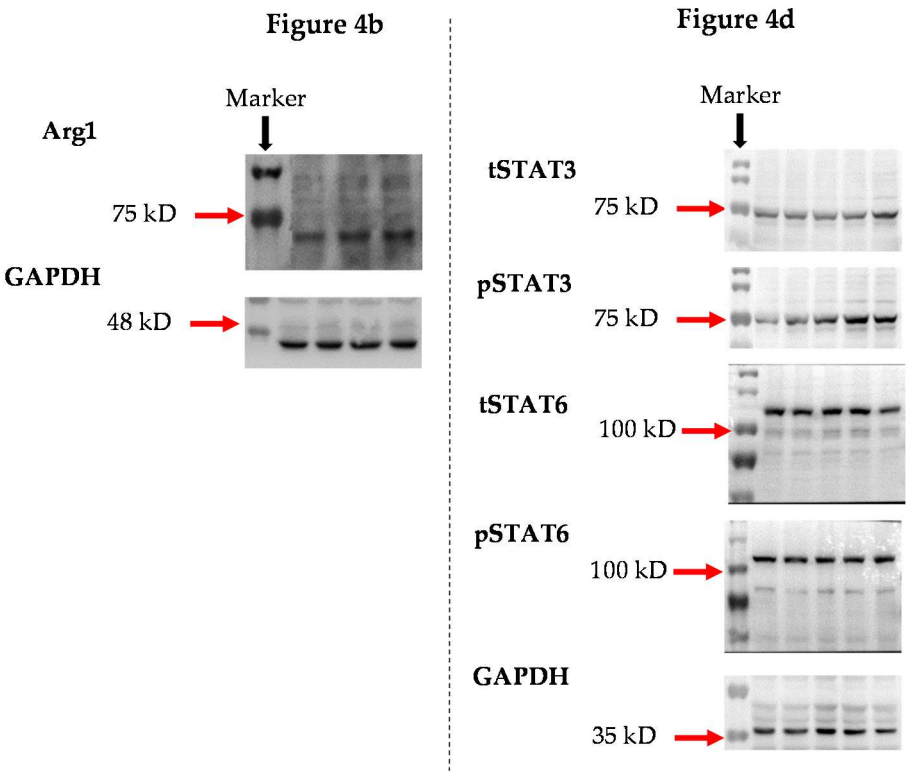

Supplement: s1 [file s1]
